# Supplementary material
Source: PubMed Central journal article supplement (PMC2811410)
Supplement: NIHMS154823-supplement-01.pdf [file NIHMS154823-supplement-01.pdf]

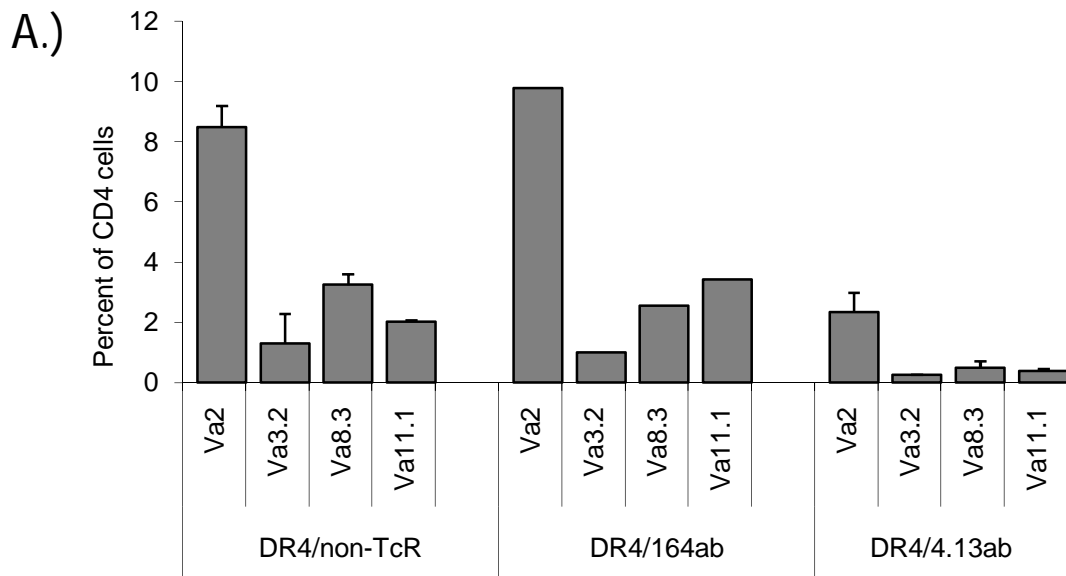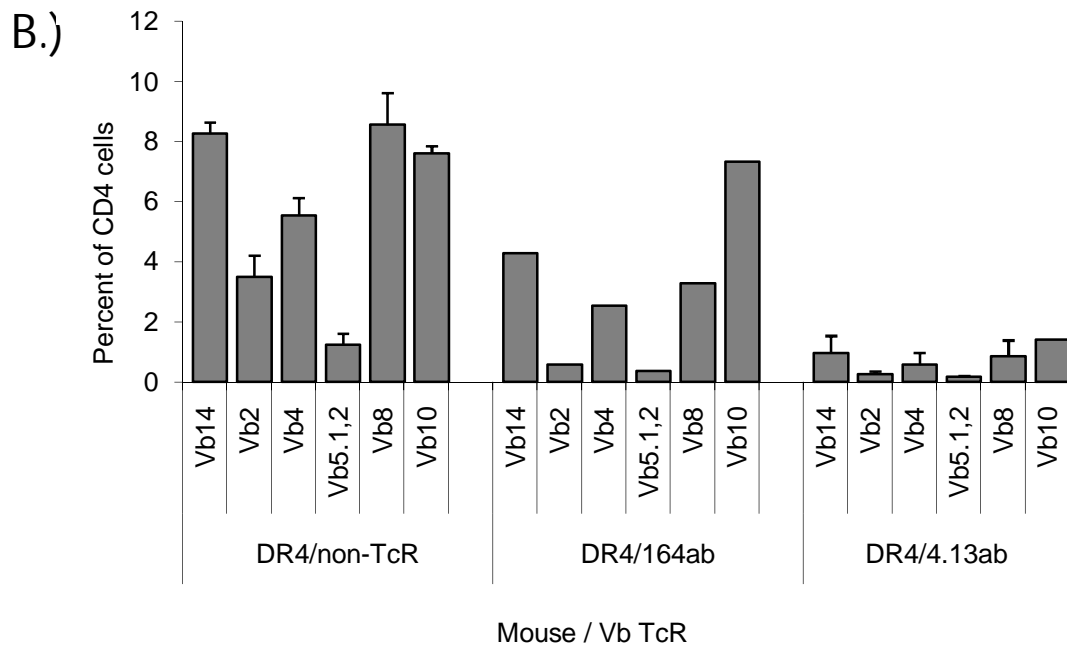

S1. TcR Valpha (A) and Vbeta (B) expression on CD4 gated T cells in DR4 non-TcR tg, DR4/164ab, and DR4/4.13ab mice. Data are from mice between the ages of 8-12 weeks

# Supplemental Figure S2

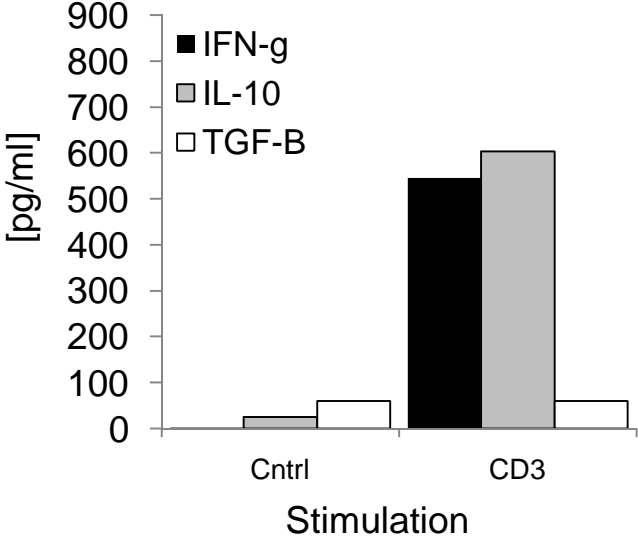

Figure S2. 4.13 TcR transgenic mice secrete IFN-g and IL-10, but not TGF-b1 upon stimulation. Purified CD4+ cells from DR4/4.13 mice were stimulated with anti-CD3/CD28 at 2.0/0.2 ug/ml. Supernatants were taken at 72 hours and assayed for cytokines. Limit of detection for TGF-b1 was 60 pg/ml

Supplemental Figure S3

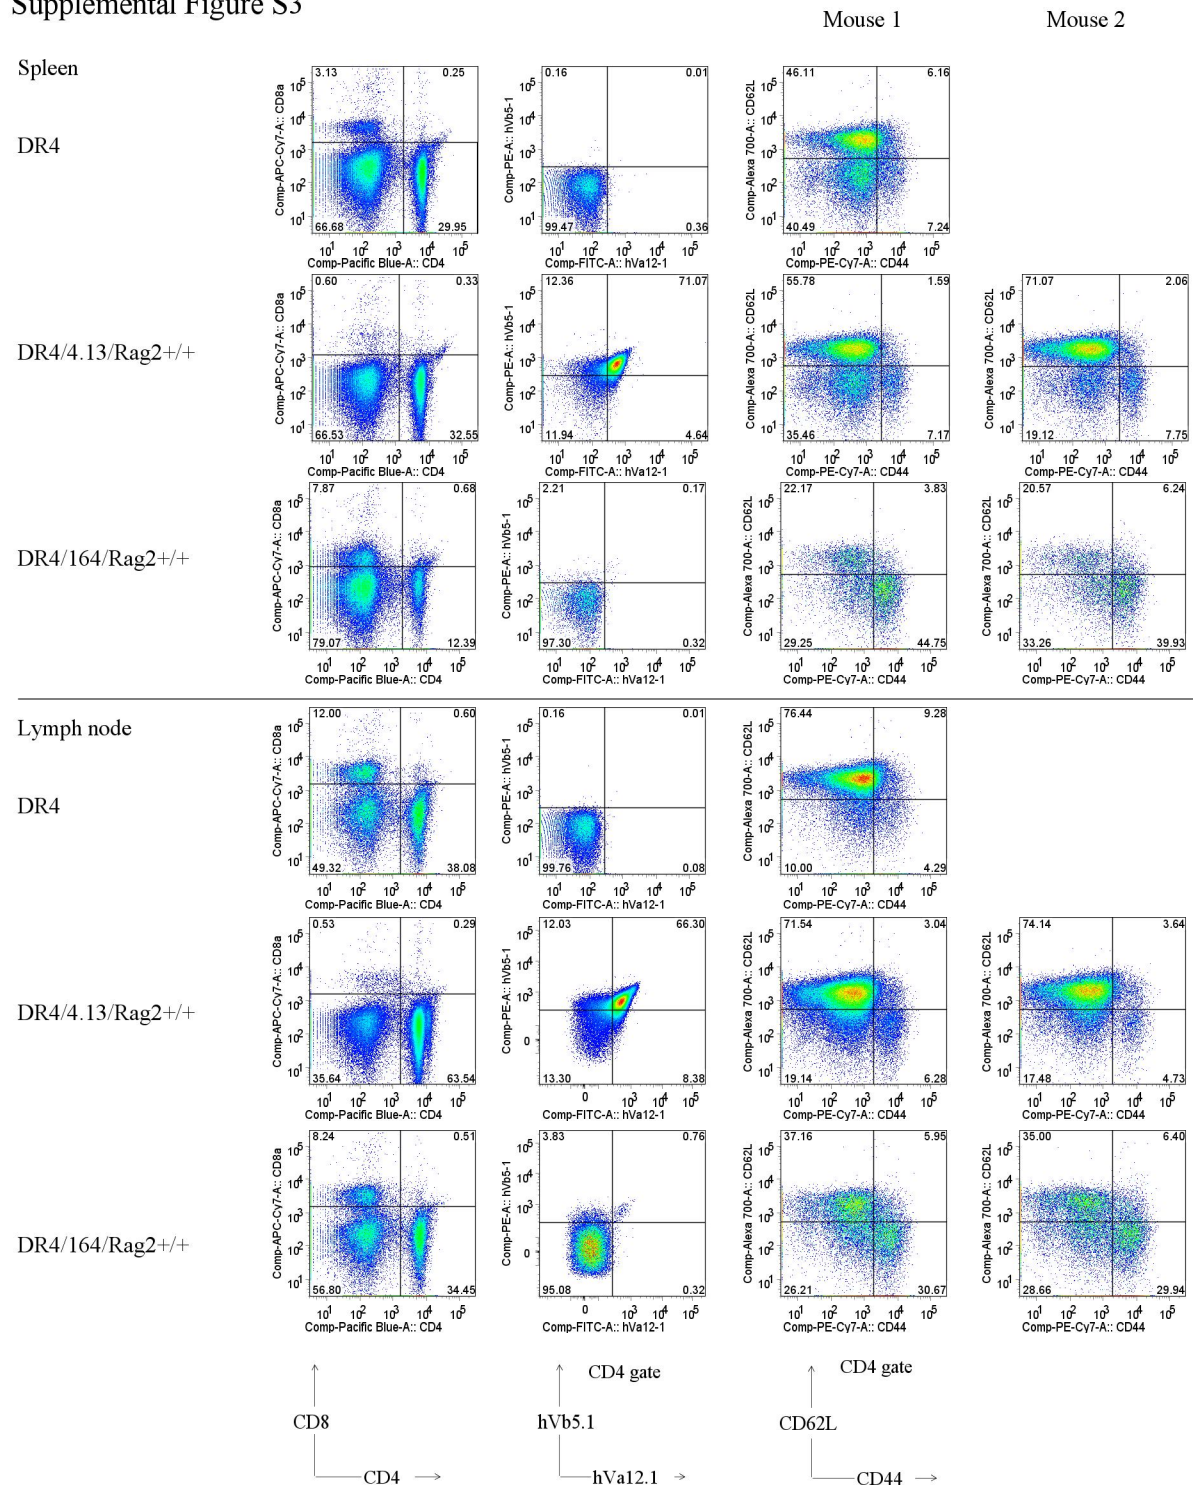

Figure S3. Surface phenotyping of spleen and lymph node cells from non-TcR transgenic 164/Rag2+/+, and 4.13/Rag2+/+ transgenic DR4 mice. Human TcR staining and CD44 vs CD62L Expression were done on CD4+/CD8- gated cells. Mice were 8-12 weeks of age.
